# Supplementary material for: Myricetin reduces cytotoxicity by suppressing hepcidin expression in MES23.5 cells
Source: PubMed Central journal article supplement — Neural Regen Res. 2020 Nov 27;16(6):1105–10. doi: 10.4103/1673-5374.300461 (PMC8224113; doi:10.4103/1673-5374.300461), 2020-11-27
Supplement: NRR-16-1105_Suppl1.pdf [file NRR-16-1105_Suppl1.pdf]

| MTT       |            |            |           |           |           |           |           |           |
|-----------|------------|------------|-----------|-----------|-----------|-----------|-----------|-----------|
| myricetin |            |            |           |           |           |           |           |           |
| 0         | $10^{-11}$ | $10^{-10}$ | $10^{-9}$ | $10^{-8}$ | $10^{-7}$ | $10^{-6}$ | $10^{-5}$ | $10^{-4}$ |
| 100.5079  | 92.47806   | 95.26795   | 100.1041  | 102.6225  | 102.8683  | 96.0698   | 91.585    | 87.76801  |
| 97.29742  | 96.04905   | 94.56403   | 91.10156  | 96.1342   | 97.97312  | 92.1396   | 92.83601  | 89.13825  |
| 102.0832  | 97.37457   | 94.53116   | 97.52196  | 100.313   | 99.18324  | 88.71051  | 93.21975  | 91.82603  |
| 106.4731  | 92.47806   | 95.26795   | 102.7419  | 105.6225  | 105.8683  | 100.0698  | 99.585    | 92.17548  |
| 93.89675  |            | 91.34916   | 93.14827  | 93.61832  | 96.79312  | 90.19436  | 91.23581  | 90.76245  |
| 99.74387  | 90.19453   | 89.69347   | 93.79001  | 95.01279  | 97.39123  | 96.10279  | 94.17623  | 92.56912  |

| myricetin+rotenone |          |            |            |           |           |           |           |           |
|--------------------|----------|------------|------------|-----------|-----------|-----------|-----------|-----------|
| Control            | Rotenone | $10^{-11}$ | $10^{-10}$ | $10^{-9}$ | $10^{-8}$ | $10^{-7}$ | $10^{-6}$ | $10^{-5}$ |
| 84.45012           | 72.28517 | 87.59261   | 99.37199   | 77.81724  | 86.06374  | 95.10056  | 110.4175  | 98.50641  |
| 115.5499           | 84.6554  | 83.91864   | 114.0178   | 110.6472  | 104.4633  | 97.66067  | 117.173   | 109.8815  |
| 100                | 72.74557 | 83.61465   | 99.03211   | 110.4473  | 104.7346  | 97.67324  | 117.0862  | 110.0079  |
|                    |          |            |            |           |           |           |           |           |
|                    |          |            |            |           |           |           |           |           |
| 102.8937           | 72.35526 | 76.43082   | 90.04517   | 76.10767  | 80.54429  | 69.59221  | 88.04718  | 80.68035  |
| 97.1063            | 61.66284 | 71.91089   | 85.96095   | 74.11465  | 79.7099   | 79.07485  | 82.2535   | 79.16754  |
| 102.8937           | 72.35526 | 76.43082   | 79.04517   | 76.10767  | 80.54429  | 69.59221  | 88.04718  | 80.68035  |
| 97.1063            | 61.66284 | 71.91089   | 77.96095   | 74.11465  | 79.7099   | 79.07485  | 82.2535   | 79.16754  |
| 115.5499           | 72.6554  | 81.98496   | 98.32497   | 111.9531  | 94.30264  | 97.98314  | 114.8872  | 107.9706  |
| 84.45012           | 66.28517 | 87.59261   | 99.37199   | 77.81724  | 86.06374  | 95.10056  | 108.3618  | 98.50641  |
| 102.8937           | 72.35526 | 76.43082   | 79.04517   | 76.10767  | 80.54429  | 69.59221  | 88.04718  | 80.68035  |
| 97.1063            |          | 71.91089   | 77.96095   | 74.11465  | 79.7099   | 79.07485  | 82.2535   | 79.16754  |

|          |          |          |          |          |          |          |          |          |
|----------|----------|----------|----------|----------|----------|----------|----------|----------|
| 115.5499 | 75.39677 | 65.3229  | 77.07618 | 86.12863 | 81.31503 | 76.0198  | 91.20832 | 85.53259 |
| 84.45012 | 71.8502  | 76.90401 | 87.24599 | 68.3215  | 75.56171 | 83.49579 | 96.94366 | 86.48604 |

| $\Delta \psi_m$ |           |          |              |
|-----------------|-----------|----------|--------------|
| control         | myricetin | rotenone | myr+rotenone |
| -1.69875        | 0.85      | -14.45   | -8.86        |

|          |        |         |         |
|----------|--------|---------|---------|
| -1.46875 | 0.66   | -17.94  | -13.56  |
| -1.83875 | -1.02  | -27.85  |         |
| -1.27875 | -3.075 | -33.435 | -18.495 |
| 4.62125  | -3.805 | -28.195 | -16.345 |
| -9.45875 | -5.235 |         | -16.115 |
| 5.23125  | 1.96   | -22.25  | -8.42   |
| 5.89125  | 1.31   | -13.24  | -9.91   |

| ROS           |           |          |              |
|---------------|-----------|----------|--------------|
| control       | myricetin | rotenone | myr+rotenone |
| 99.302        |           | 250.8258 | 184.2279     |
| 101.46        |           | 310.75   | 210.15       |
| 100.485       | 99.48     |          | 270.7359     |
| 98.826        | 90.0765   | 483.8418 | 169.5514     |
| 100.096       | 99.015    | 214.4753 | 187.696      |
| 100.0339      |           |          | 164.8438     |
|               |           |          |              |
| 99.9319       | 120.508   |          | 220.3758     |
| 99.981        | 114.9464  | 315.4059 | 281.313      |
| 100.064       | 83.9944   | 204.4104 | 152.1736     |
| hepcidin mrna | RNA       |          |              |
| control       | myricetin | rotenone | myr+rotenone |
| 1.385109      | 1.36604   | 3.446185 | 2.81529      |
| 0.4263175     | 0.2973018 | 1.522973 | 1            |
| 1.36604       | 0.3882344 | 2.602684 | 1.513394     |
| 0.7345653     | 1.36604   | 2.681793 | 1.314909     |
| 1.385109      | 0.6       | 2.479415 | 0.9712       |
| 0.7448551     |           | 2.675855 | 1.838303     |
| 0.5660857     |           | 1.469169 | 0.7631296    |

FPN1 RNA

FPN1

| control   | myricetin | rotenone  | myr+rotenone |
|-----------|-----------|-----------|--------------|
| 1.101773  | 1.025267  | 0.5864175 | 0.9500004    |
| 1.185915  | 0.9566082 | 0.8645372 |              |
| 1.09264   |           | 0.81      | 0.8681402    |
| 0.92319   |           | 0.5864175 | 0.73         |
| 1.164734  |           | 0.7863817 | 1.09         |
| 1.398     | 1.025267  | 0.541863  | 0.8239       |
| 0.9972312 | 1.3       | 0.671342  | 1.185915     |

| pstat3/stat3 |           |          |              |
|--------------|-----------|----------|--------------|
| control      | myricetin | rotenone | myr+rotenone |
| 0.9599296    | 0.7755859 | 1.35741  | 0.7754502    |
|              | 0.7998524 | 1.053853 |              |
| 0.8866314    | 0.898181  | 1.085168 | 0.5987466    |
| 0.6044913    |           | 1.108301 | 0.8847486    |

|           |  |           |           |
|-----------|--|-----------|-----------|
| 0.7151948 |  | 1.166858  | 0.9579607 |
| 0.9607022 |  | 0.9750494 | 0.770041  |
| 0.4837054 |  | 1.07879   | 0.9785155 |
| 0.9185771 |  | 1.410449  | 0.8251632 |

|           |           |          |           |
|-----------|-----------|----------|-----------|
| 0.5297663 | 0.4531178 | 1.342313 |           |
| 0.7641585 | 0.6808842 | 1.04425  | 0.5884264 |

|           |           |           |           |
|-----------|-----------|-----------|-----------|
| 0.9482399 | 0.9430321 | 0.9010217 | 0.8542582 |
| 0.5382553 | 0.5983827 | 0.8849455 | 0.694717  |

| protein   |           |           |              |
|-----------|-----------|-----------|--------------|
| control   | myricetin | rotenone  | myr+rotenone |
| 0.863428  | 0.8609213 | 0.4432513 | 0.7119566    |
| 1.087381  | 1.195028  | 0.5916585 | 0.677922     |
| 1.127609  | 1.574509  | 0.7821372 | 1.057392     |
| 0.9782632 | 1.214768  |           | 0.7821372    |

|           |          |           |           |
|-----------|----------|-----------|-----------|
| 0.9035969 | 1.360913 | 0.5677113 | 0.8990536 |
| 1.028269  | 1.772731 | 0.5896606 | 0.7134081 |
| 0.7844354 | 1.323146 | 0.6126285 |           |
| 0.8672529 | 1.476117 | 0.6751839 | 0.9653745 |

|          |           |           |           |
|----------|-----------|-----------|-----------|
|          | 0.832533  | 0.7988839 | 0.9263726 |
|          | 1.112111  | 0.4672239 | 1.194488  |
| 1.09108  | 0.9114388 | 0.8677406 | 1.145554  |
| 1.285197 | 0.9572611 | 0.8008156 | 1.585559  |

| pSMAD/SMAD |           |          |              |
|------------|-----------|----------|--------------|
| control    | myricetin | rotenone | myr+rotenone |
| 1.164368   |           | 1.632541 | 1.207064     |
| 0.6580496  |           |          | 0.9200712    |
| 1.189195   |           | 1.650782 | 1.138914     |

|           |  |           |           |
|-----------|--|-----------|-----------|
| 0.7732548 |  | 1.158219  | 0.8036213 |
| 0.6806578 |  | 1.002568  | 0.8265967 |
| 1         |  | 0.9939813 | 0.8770179 |
| 1.017288  |  | 1.95932   | 1.42136   |

|           |           |           |           |
|-----------|-----------|-----------|-----------|
| 0.6319976 |           | 0.8801189 | 0.7730504 |
| 0.7639681 |           | 1.022618  | 0.4451074 |
| 0.7846255 |           | 1.19162   |           |
| 0.8656312 | 0.7622561 | 1.100634  | 1.019643  |
| 0.9132912 | 0.8855873 | 1.00965   | 0.959134  |
|           | 0.7488545 | 0.8877853 | 0.7305094 |
| 0.6030155 | 0.5161129 | 0.7912628 | 0.6880866 |
| 0.9768348 | 0.6484043 | 1.347742  |           |
| 0.2628651 | 0.2259915 | 0.8929173 | 0.7354019 |
